# Supplementary material for: Construction and Validation of a Risk Prediction Model for Clinical Axillary Lymph Node Metastasis in T1–2 Breast Cancer
Source: Research Square preprint supplement (doi:10.21203/rs.3.rs-949064/v1), 2021-10-01
Supplement: Supplementary file 1 [file a6ce61eac4db2bdc357f1a88.docx]

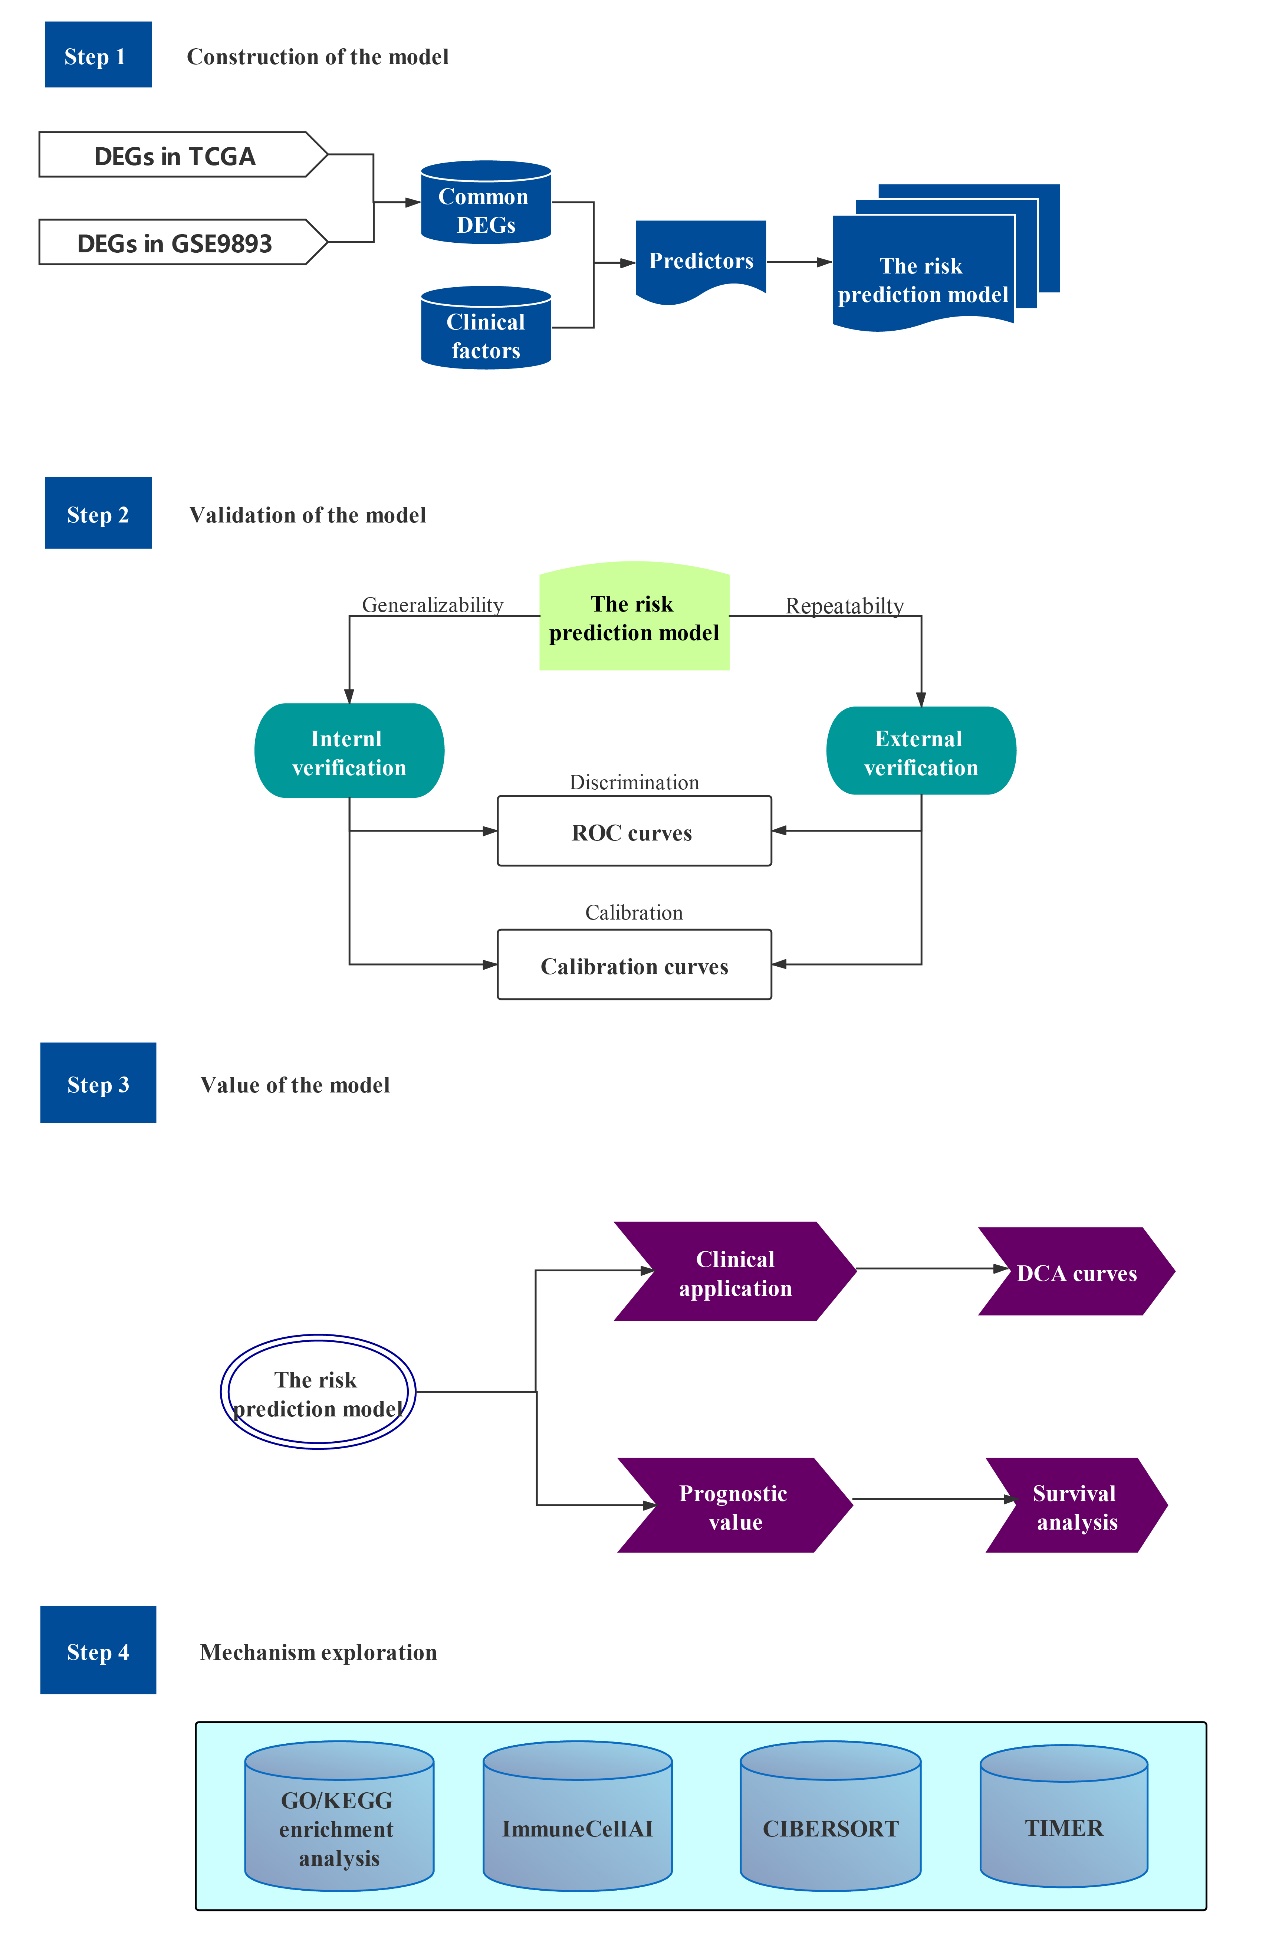


Supplementary Figure 1 Flow chart of this study.


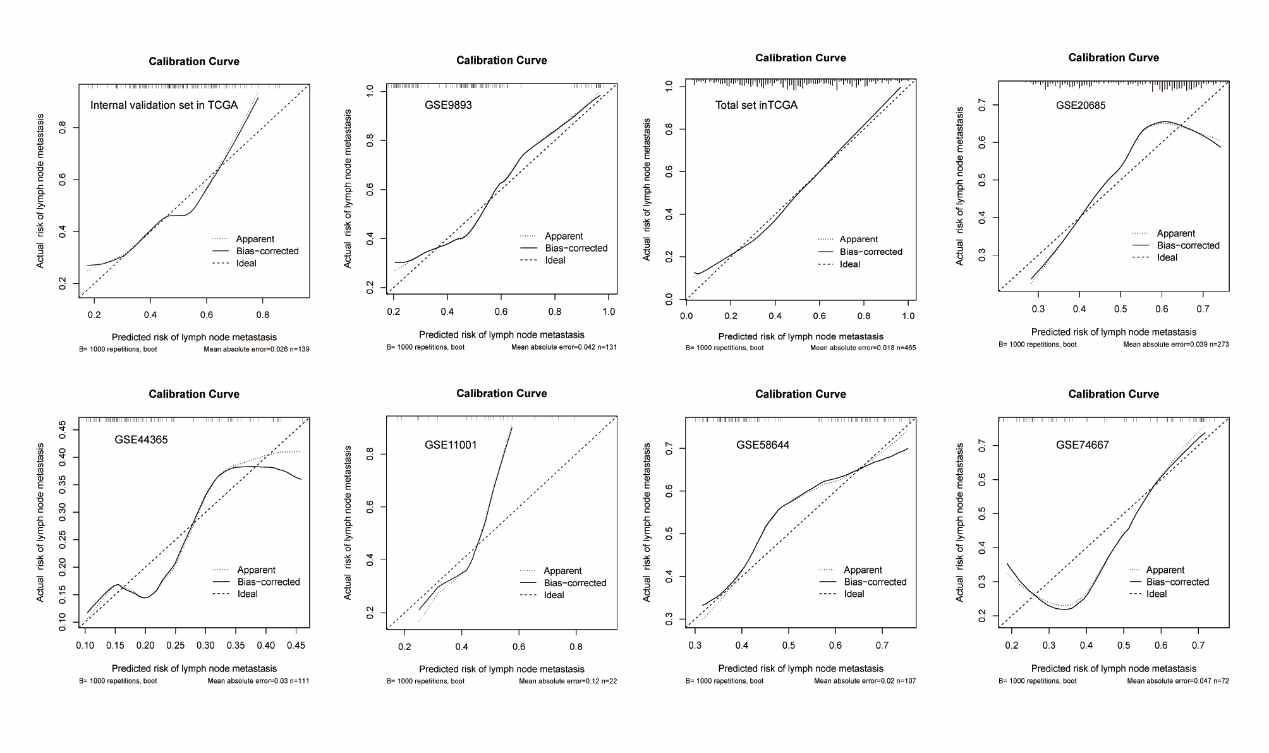


Supplementary Figure 2 Calibration curves of the risk prediction model in T1-2 invasive breast cancer.
